# Supplementary material
Source: ML conference proceedings conference paper supplement (https://openaccess.thecvf.com/content/ICCV2021/html/Rachavarapu_Localize_to_Binauralize_ICCV_2021_paper.html)
Supplement: Supplementary file 1 [file Rachavarapu_Localize_to_Binauralize_ICCV_2021_supplemental.pdf]

# Localize to Binauralize: Audio Spatialization from Visual Sound Source Localization

## SUPPLEMENTARY MATERIAL

Kranthi Kumar Rachavarapu    Aakanksha    Vignesh Sundaresha    Rajagopalan A. N.  
Indian Institute of Technology Madras, India  
{kranthi.rachavarapu, aakankshajha30, vigneshsundaresh}@gmail.com    raju@ee.iitm.ac.in

### S1. Qualitative comparison of Binaural Audio

The video results are available on our project page<sup>1</sup>. This file contains a compilation of videos for qualitative comparison. The following are the time-stamps of the results in this video:

- The localization output and the binaural audio generated using the proposed L2BNet trained with Weakly Semi-Supervised framework is available from 00 : 00 – 02 : 15 sec.
- Comparison between the audio output of L2BNet generated using Weakly Supervised vs. Weakly Semi-Supervised framework is available from 02 : 15 – 04 : 03 sec.
- A few samples used in User-study are available from 04 : 03 – 08 : 51 sec.

### S2. Additional Qualitative results for Sound Source Localization using Audio

Visual comparisons of Sound Source Localization using various input audio forms are available in Figure S1 and Figure S2.

### S3. Qualitative results for Sound Source Localization in Weakly Supervised and Weakly Semi-Supervised Learning setup

Visual comparisons of Sound Source Localization task of the L2BNet train with *Weakly Supervised* setup is shown in Figure S3. SSL task output of L2BNet trained with Weakly Semi-Supervised setup with 10% supervision on FAIR-Play [1] dataset is shown in Figure S4 and on YTMusic [2] dataset is shown in Figure S5.

### S4. Implementation Details

The proposed L2BNet consists of two subnetworks: Stereo-Generation Network and Audio Localization network. The layer-wise details of the SG network are reported in Table S1 and AL network are reported in Table S2.

### References

- [1] Ruohan Gao and Kristen Grauman. 2.5 d visual sound. In *Proceedings of the IEEE Conference on Computer Vision and Pattern Recognition*, pages 324–333, 2019. 1
- [2] Timothy Langlois Pedro Morgado, Nuno Vasconcelos and Oliver Wang. Self-supervised generation of spatial audio for 360deg video. In *Neural Information Processing Systems (NIPS)*, 2018. 1

---

<sup>1</sup><https://github.com/KranthiKumarR/Localize-to-Binauralize>

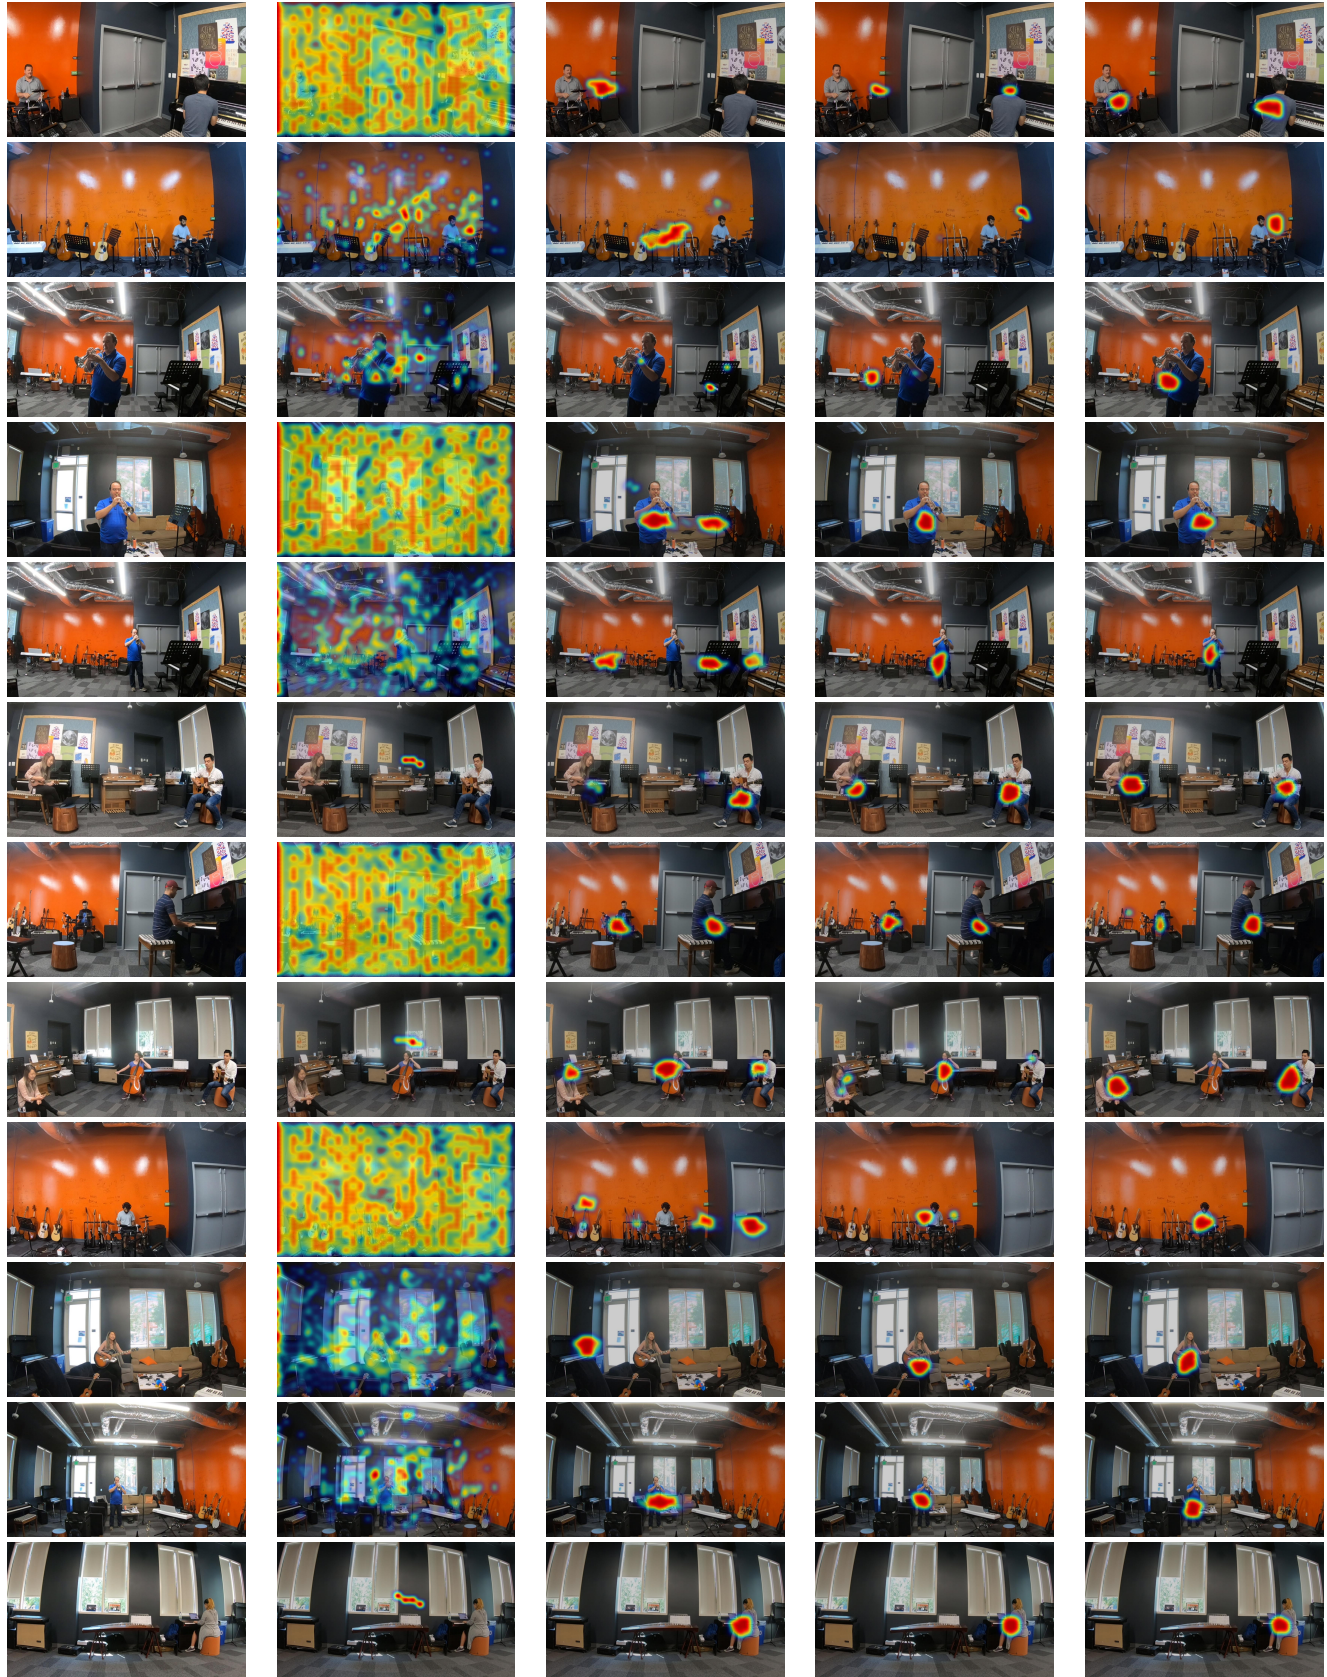

Figure S1. Visual comparisons of Audio-based Visual Sound Source Localization task using various input audio forms (a) *Visual frame* (b) from *monaural audio* (c) from *binaural mixed audio* (d) from *binaural audio* (e) *ILD&ITD features*.

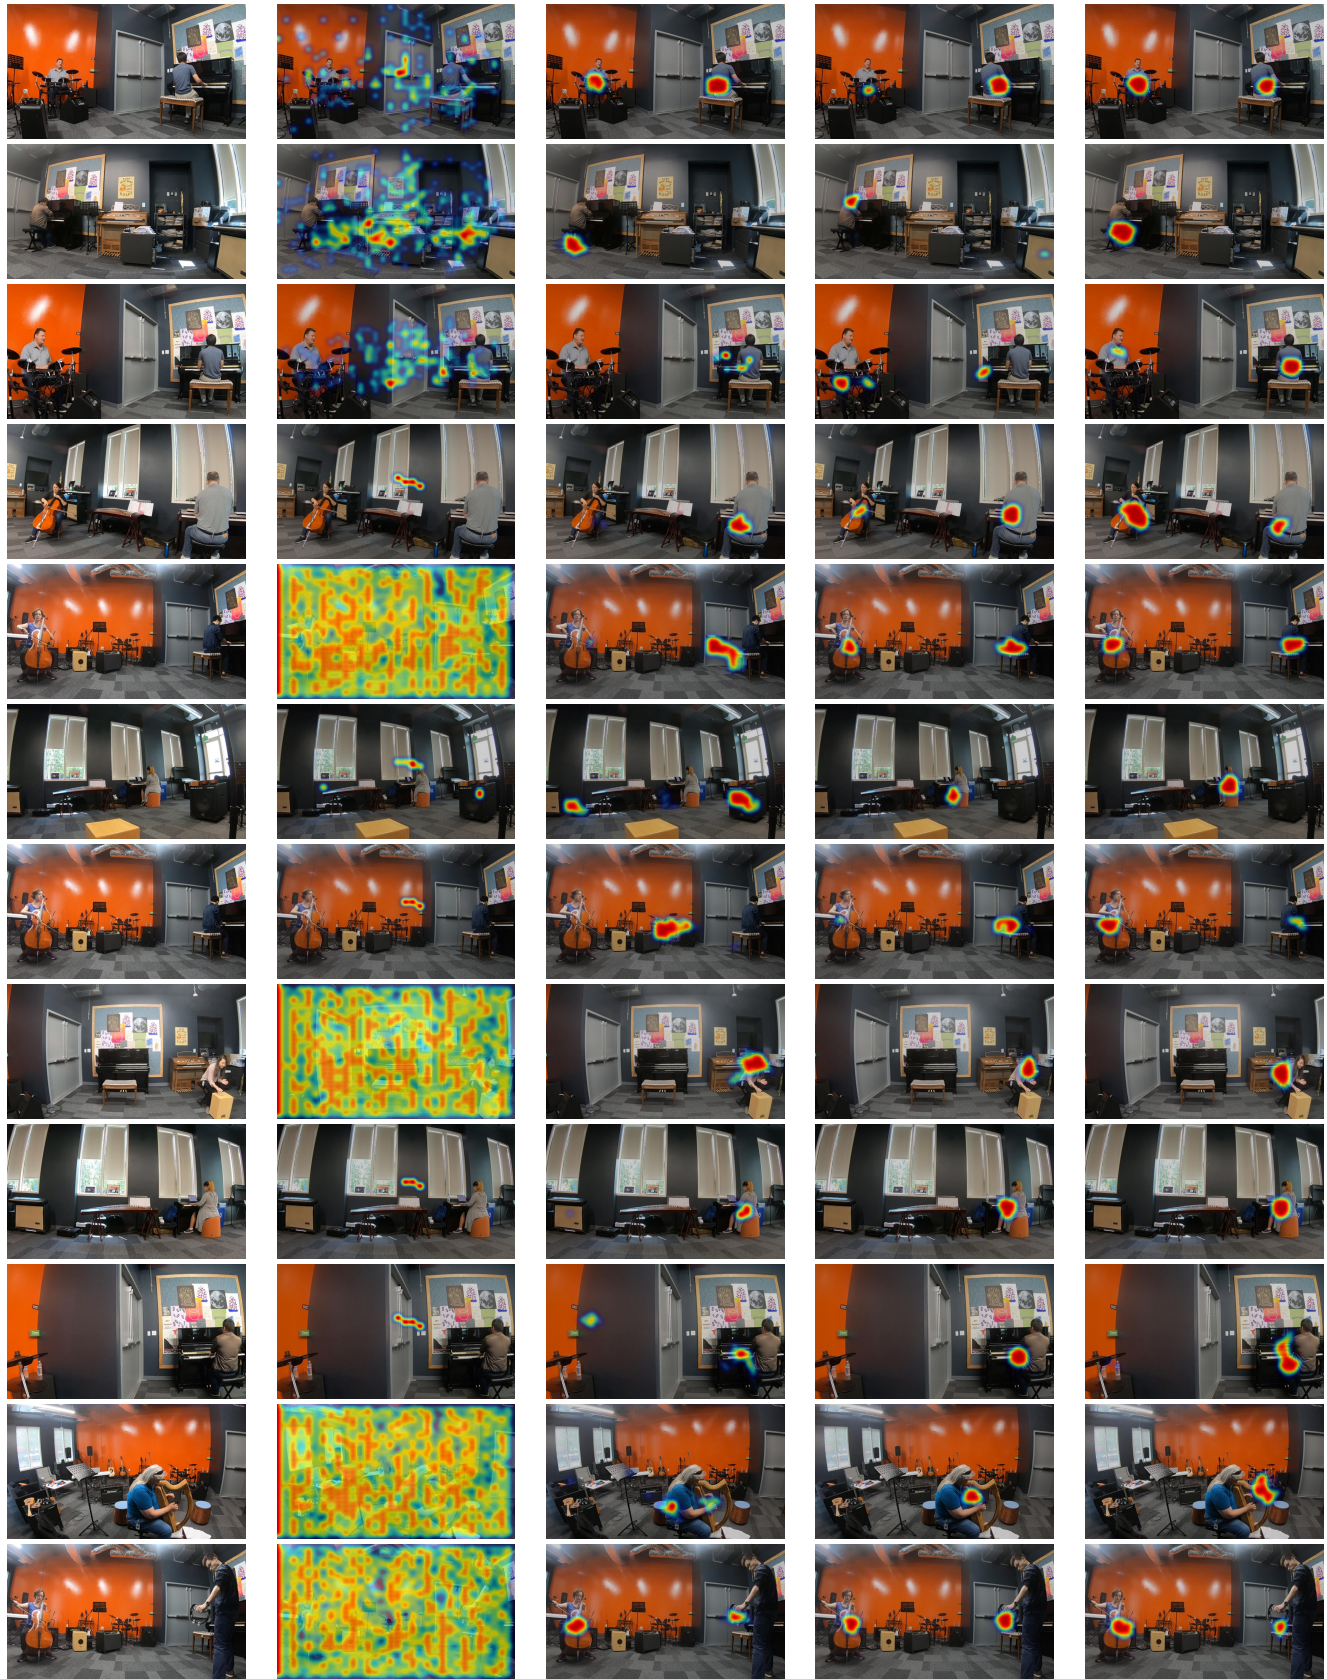

Figure S2. Visual comparisons of Audio-based Visual Sound Source Localization task using various input audio forms (a) *Visual frame* (b) from *monaural audio* (c) from *binaural mixed audio* (d) from *binaural audio* (e) *ILD&ITD features*.

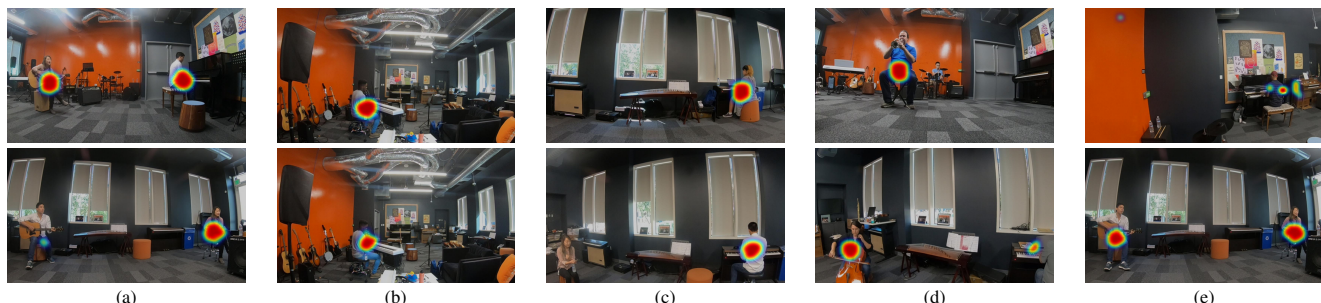

Figure S3. Visual comparisons of sound source localization task of the L2BNet trained with *Weakly Supervised* learning setup.

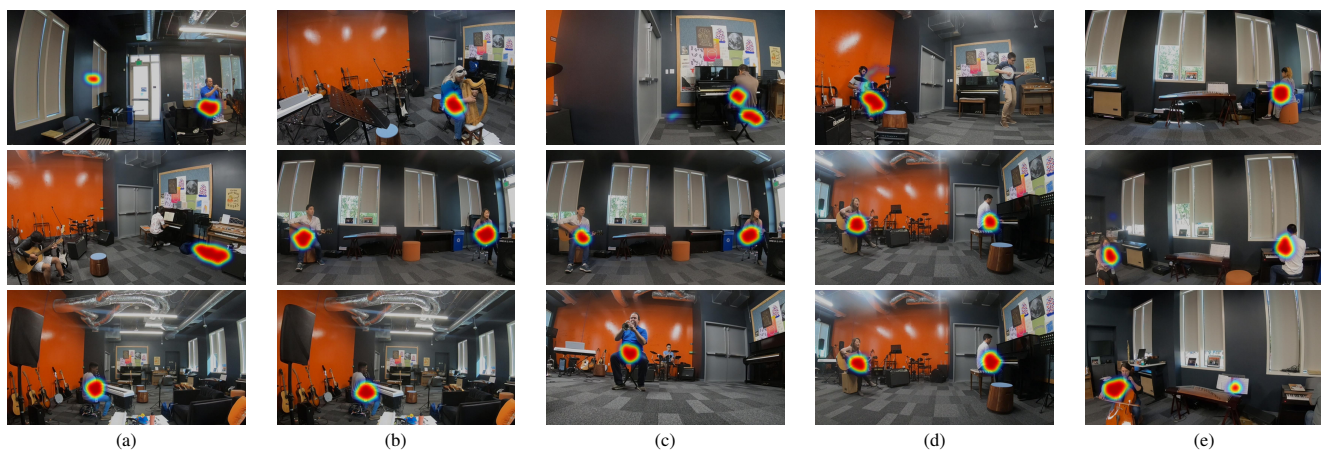

Figure S4. Visual comparisons of sound source localization task of the L2BNet trained with *Weakly Semi-Supervised* learning setup.

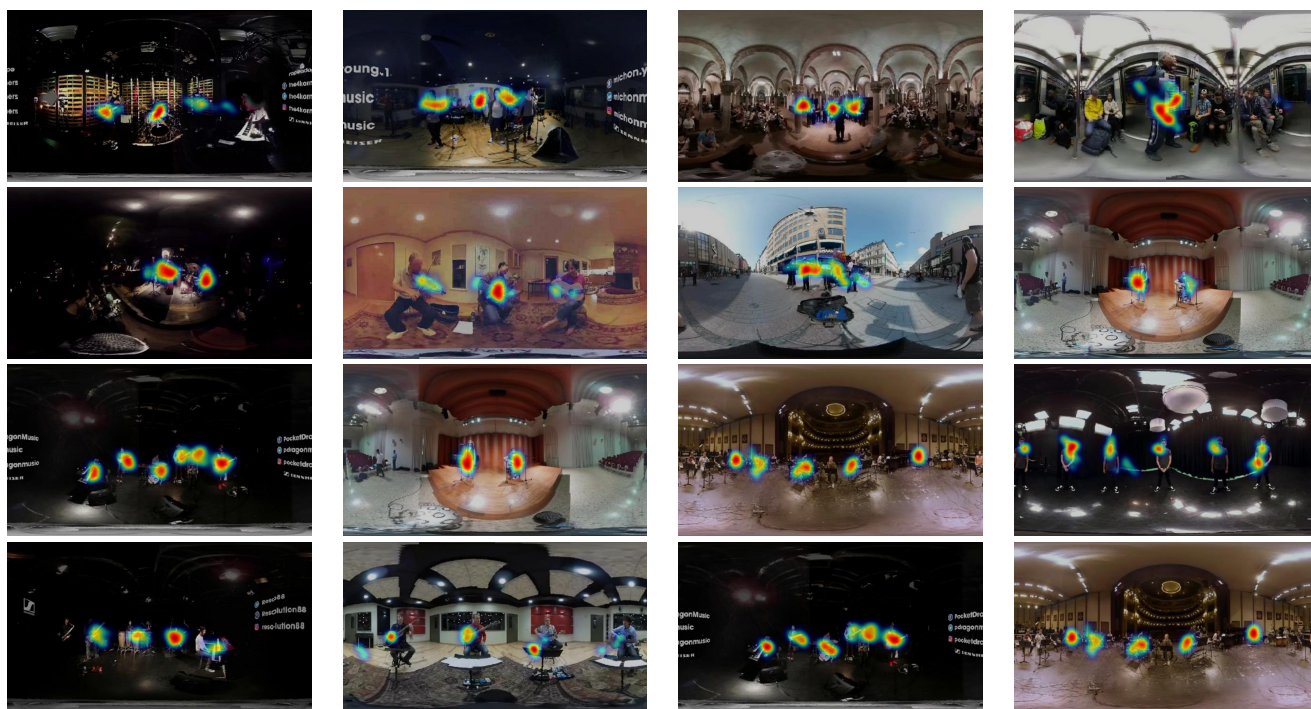

Figure S5. Visual comparisons of sound source localization task of the L2BNet trained with *Weakly Semi-Supervised* learning setup on YTMusic Dataset.

| Subnetwork        | Name                 | Type             | K  | S   | Out |
|-------------------|----------------------|------------------|----|-----|-----|
| Audio Subnetwork  | Encoder              | Conv-2D          | 4  | 2   | 64  |
|                   |                      | BatchNorm-2D     | -  | -   | 64  |
|                   |                      | Conv-2D          | 4  | 2   | 128 |
|                   |                      | BatchNorm-2D     | -  | -   | 128 |
|                   |                      | Conv-2D          | 4  | 2   | 256 |
|                   |                      | BatchNorm-2D     | -  | -   | 256 |
|                   |                      | Conv-2D          | 4  | 2   | 512 |
|                   |                      | BatchNorm-2D     | -  | -   | 512 |
|                   |                      | Conv-2D          | 4  | 2   | 512 |
|                   | BatchNorm-2D         | -                | -  | 512 |     |
|                   | Decoder              | ConvTranspose-2D | 4  | 2   | 512 |
|                   |                      | BatchNorm-2D     | -  | -   | 512 |
|                   |                      | ConvTranspose-2D | 4  | 2   | 256 |
|                   |                      | BatchNorm-2D     | -  | -   | 256 |
|                   |                      | ConvTranspose-2D | 4  | 2   | 128 |
|                   |                      | BatchNorm-2D     | -  | -   | 128 |
| ConvTranspose-2D  |                      | 4                | 2  | 64  |     |
| BatchNorm-2D      | -                    | -                | 64 |     |     |
| ConvTranspose-2D  | 4                    | 2                | 2  |     |     |
| BatchNorm-2D      | -                    | -                | 2  |     |     |
| Visual Subnetwork | Pretrained ResNet-18 |                  |    |     |     |
| Attention         | Query                | Conv-2D          | 3  | 1   | 512 |
|                   | Key                  | Conv-2D          | 3  | 1   | 512 |
|                   | Value                | Conv-2D          | 3  | 1   | 512 |

Table S1. Architecture summary of Stereo-Generation Network.  $K$  stands for kernel size,  $S$  for stride,  $n_f$  for number of input feature channels and  $Out$  for number of channels in convolutional layers. All the layers use *Leaky-ReLU* activation.

| Name    | Type             | K | S | Out  |
|---------|------------------|---|---|------|
| Encoder | Conv-2D          | 4 | 2 | 64   |
|         | BatchNorm-2D     | - | - | 64   |
|         | Conv-2D          | 4 | 2 | 128  |
|         | BatchNorm-2D     | - | - | 128  |
|         | Conv-2D          | 4 | 2 | 256  |
|         | BatchNorm-2D     | - | - | 256  |
|         | Conv-2D          | 4 | 2 | 512  |
|         | BatchNorm-2D     | - | - | 512  |
|         | Conv-2D          | 4 | 2 | 512  |
|         | BatchNorm-2D     | - | - | 512  |
|         | Conv-2D          | 4 | 2 | 1024 |
|         | BatchNorm-2D     | - | - | 1024 |
|         | AveragePool-2D   |   |   |      |
| Decoder | ConvTranspose-2D | 4 | 2 | 512  |
|         | BatchNorm-2D     | - | - | 512  |
|         | ConvTranspose-2D | 4 | 2 | 256  |
|         | BatchNorm-2D     | - | - | 256  |
|         | ConvTranspose-2D | 4 | 2 | 128  |
|         | BatchNorm-2D     | - | - | 128  |
|         | ConvTranspose-2D | 4 | 2 | 32   |
|         | BatchNorm-2D     | - | - | 32   |
|         | ConvTranspose-2D | 4 | 2 | 4    |
|         | BatchNorm-2D     | - | - | 4    |
|         | ConvTranspose-2D | 4 | 2 | 1    |
|         | BatchNorm-2D     | - | - | 1    |

Table S2. Architecture summary of Audio-Localization Network.  $K$  stands for kernel size,  $S$  for stride,  $n_f$  for number of input feature channels and  $Out$  for number of channels in convolutional layers. All the layers use *Leaky-ReLU* activation.
